# Supplementary material for: Chylomicron-biomimetic nanoparticles promote intestinal lymphatic transport by fast fusion with chylomicrons
Source: Research Square preprint supplement (doi:10.21203/rs.3.rs-6301196/v1), 2025-04-28
Supplement: Supplementary file 1 [file 99acd5ab6a2495de7176ba21.docx]

**Supporting Information**

**Chylomicron-biomimetic nanoparticles promote intestinal lymphatic transport by fast fusion with chylomicrons**

Yawen Yao a, b, †, Cuihua Zhang a, †, Jieying Zhou a, Shihao Xu a, c, Ying Li a, Haiqiang Wu a*, Hua Yu b, *, Wei Xiong a, *

a School of Pharmacy, Shenzhen University Medical School, Shenzhen University, Shenzhen 518055, China

b Institute of Chinese Medical Sciences, State Key Laboratory of Quality Research in Chinese Medicine, University of Macau, Macao SAR, China

c School of Chinese Pharmacy, Shenyang Pharmaceutical University, Shenyang, 110016, China.

† These authors contributed equally to this work.

**Correspondence to:**

**Haiqiang Wu**

School of Pharmacy, Shenzhen University Medical School, Shenzhen University, 1066 Xueyuan Avenue, Nanshan District, Shenzhen, 518055, China

E-mail: [wuhq@szu.edu.cn](mailto:wuhq@szu.edu.cn)

**Hua Yu**

Institute of Chinese Medical Sciences, State Key Laboratory of Quality Research in Chinese Medicine, University of Macau, Taipa, Macao SAR, China

E-mail: [bcalecyu@um.edu.mo](mailto:bcalecyu@um.edu.mo)

**Wei Xiong**

School of Pharmacy, Shenzhen University Medical School, Shenzhen University, 1066 Xueyuan Avenue, Nanshan District, Shenzhen, 518055, China

E-mail: [weixiong@szu.edu.cn](mailto:weixiong@szu.edu.cn)

**Supplementary figures**


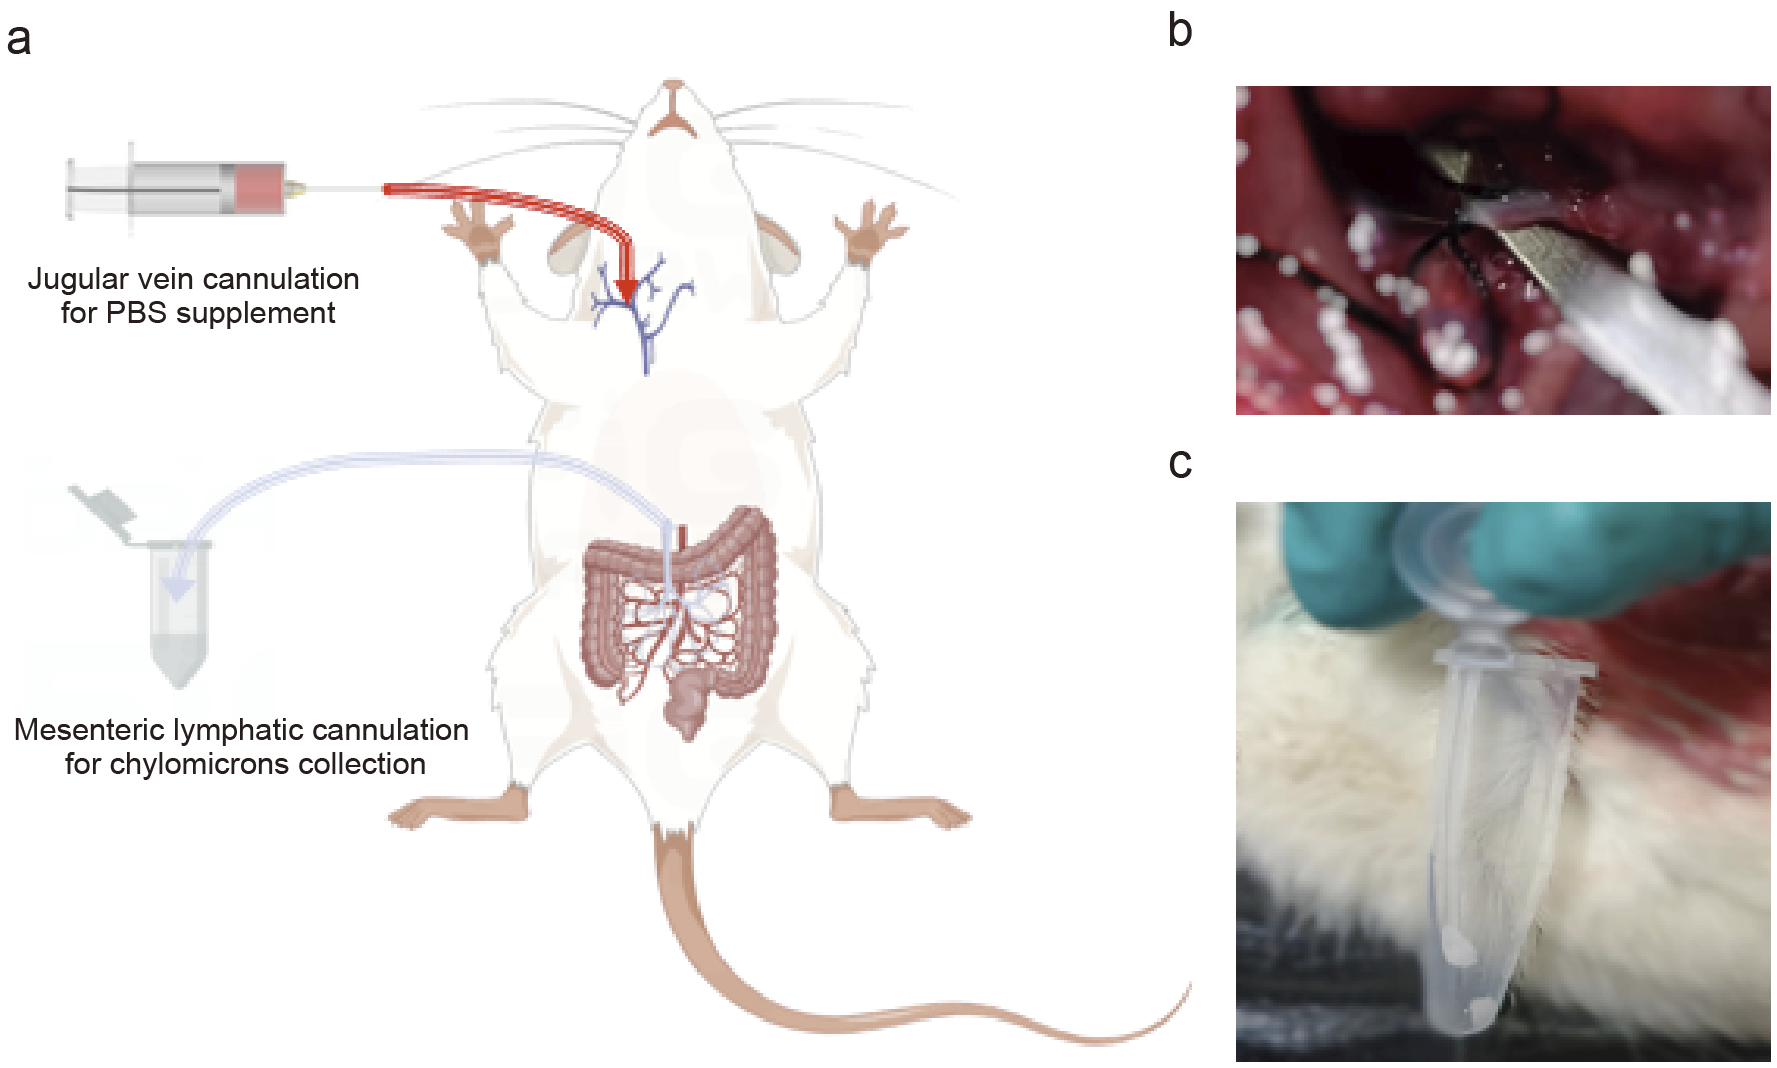


**Supplementary Fig. 1 Natural chylomicrons (nCMs) collected from an overnight-fasted rat. a** Schematic representation of lymphatic fluid collection by cannulation into the main mesenteric lymphatic duct. **b** Visualization of the main mesenteric lymphatic duct. **c** nCMs collected from a rat 1 hour after oral administration of olive oil.


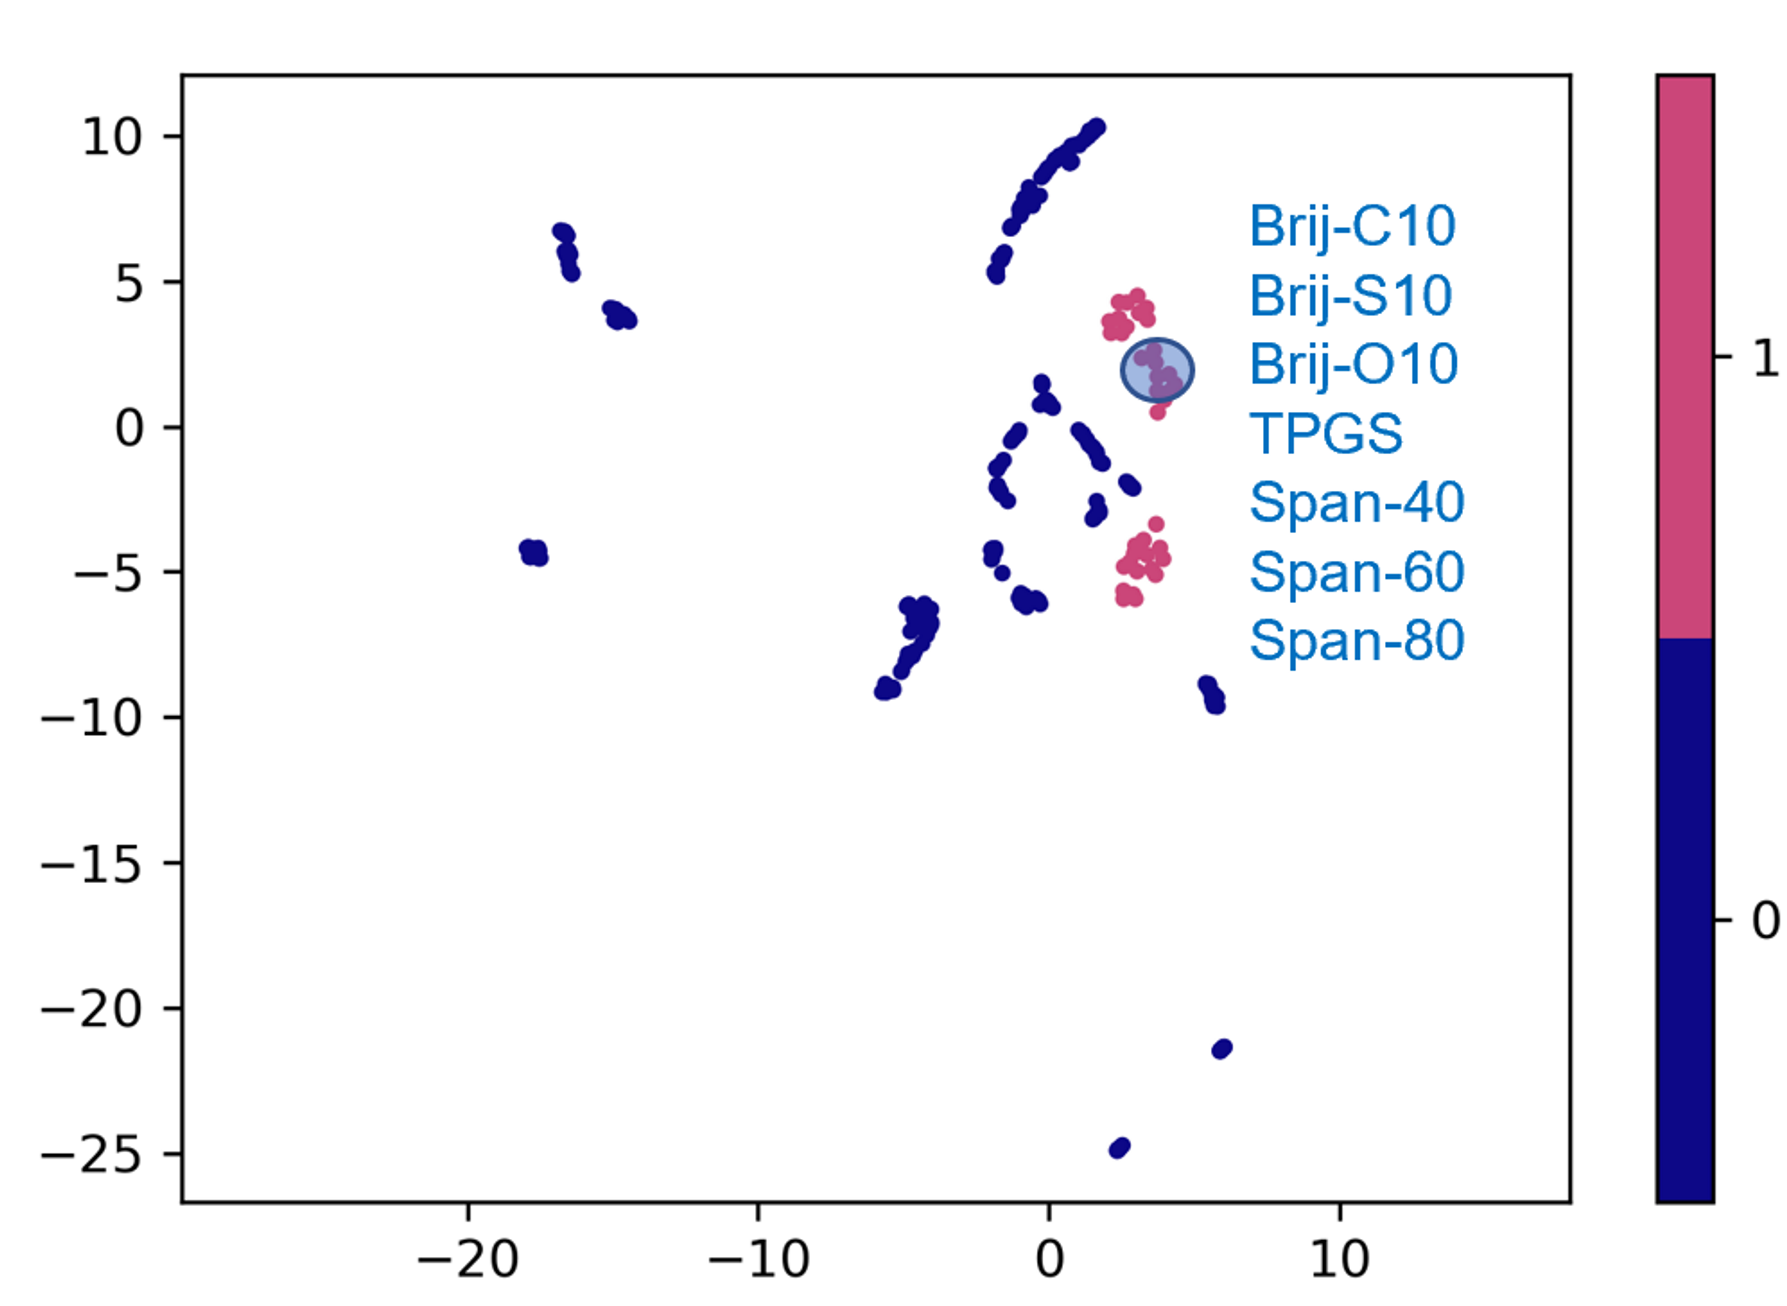


**Supplementary Fig. 2** **Screening of pharmaceutical excipients with high lipoprotein affinity using the cluster analysis method.**

**
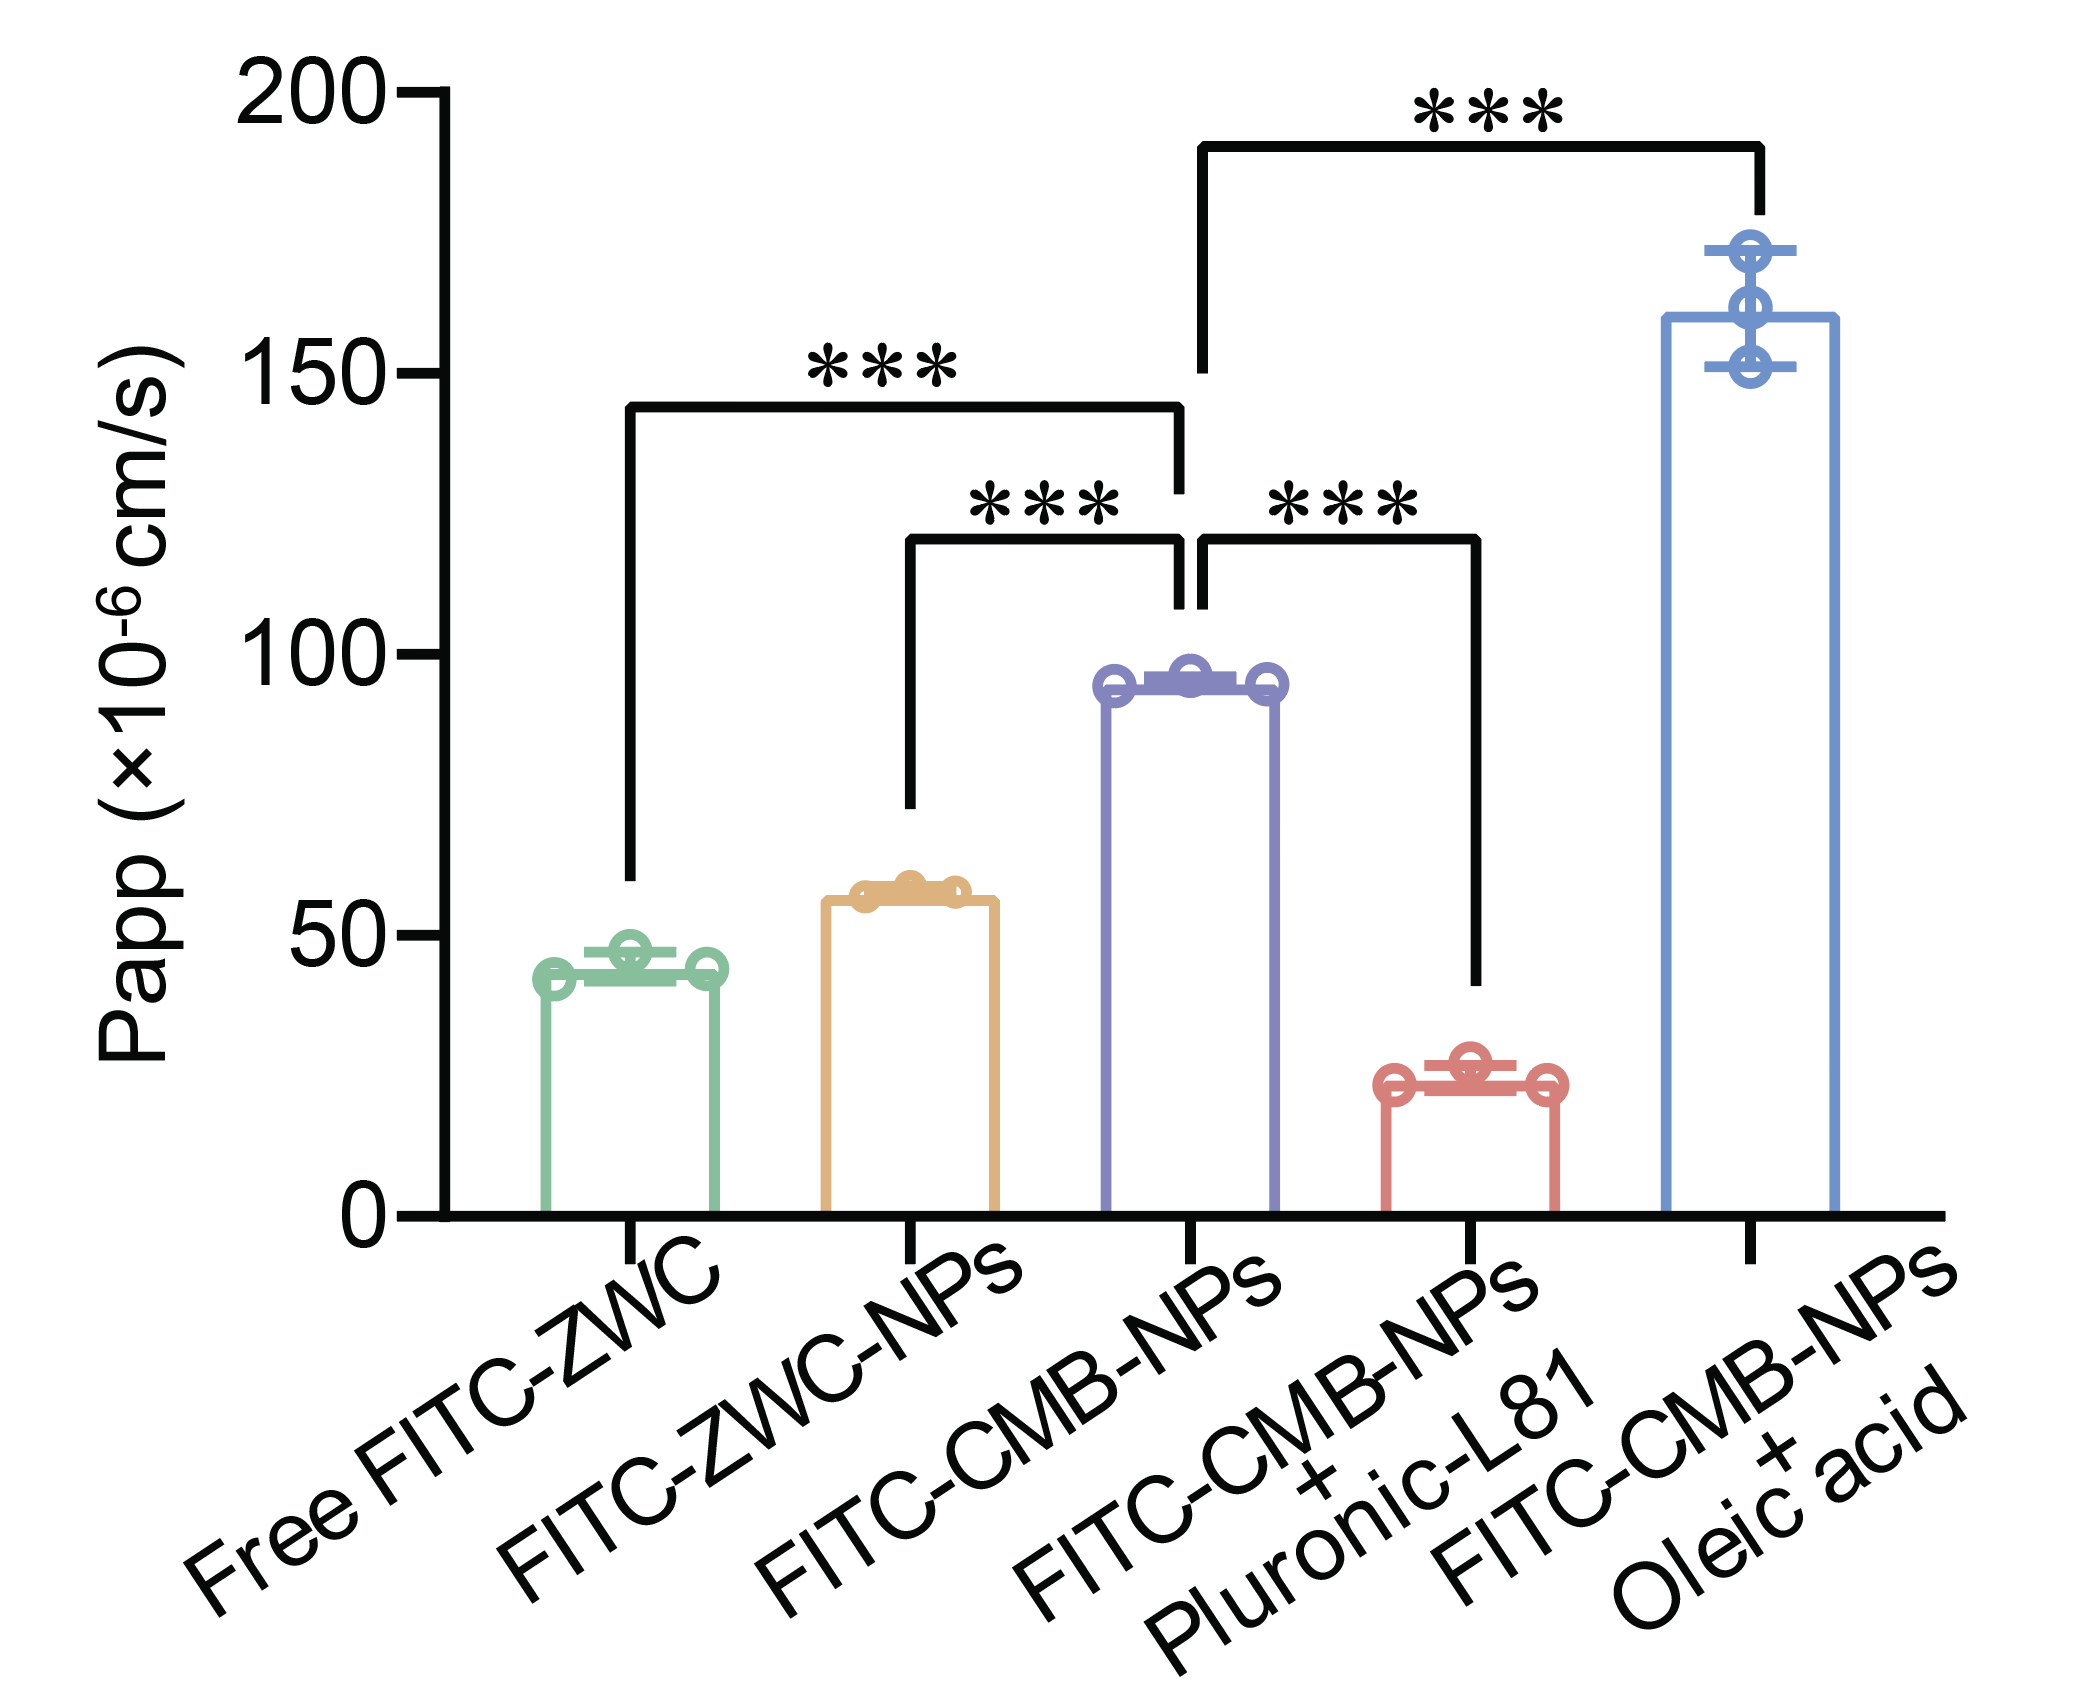
**

**Supplementary Fig. 3 Apparent permeability of FITC-CMB-NPs in a Caco-2 cell monolayer in the presence of Pluronic-L81 or oleic acid.**

**
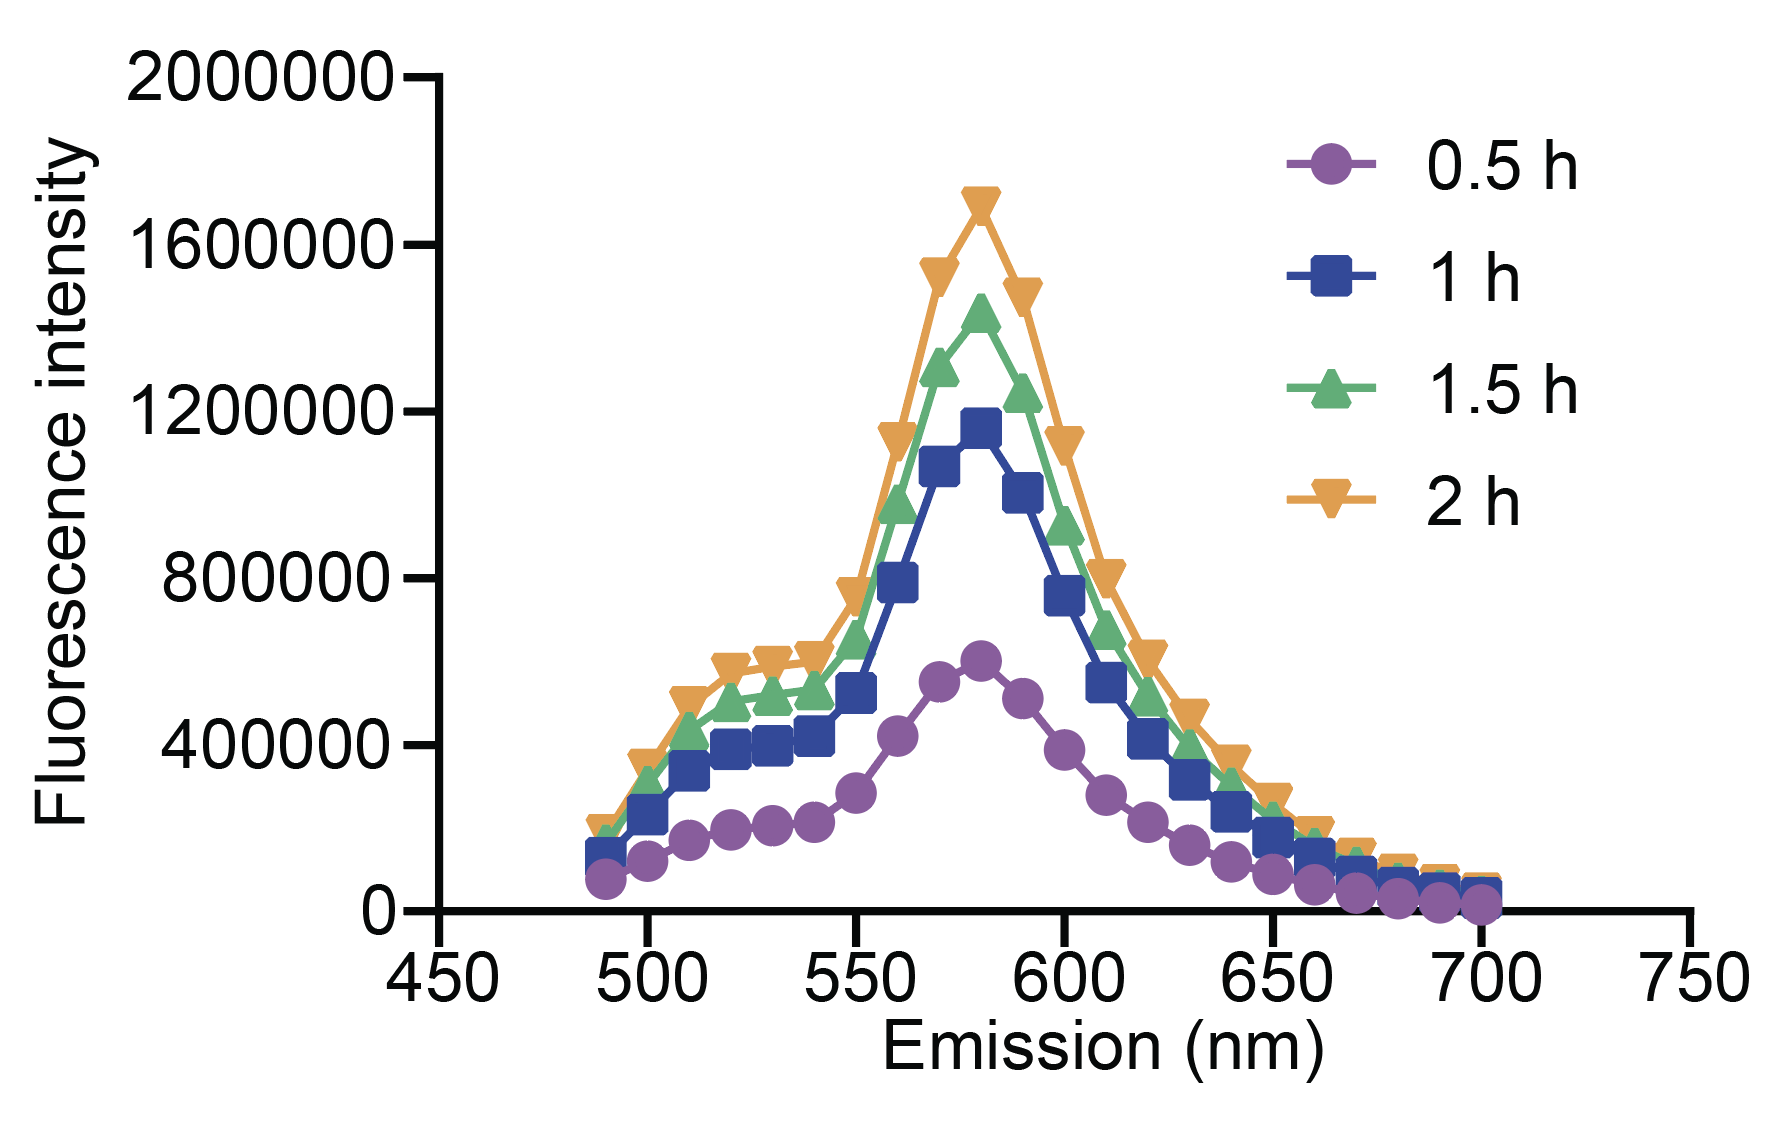
**

**Supplementary** **Fig. 4 Emission spectra of FRET-CMB-NPs after crossing a Caco-2 cell monolayer over a 2-hour period.**

**
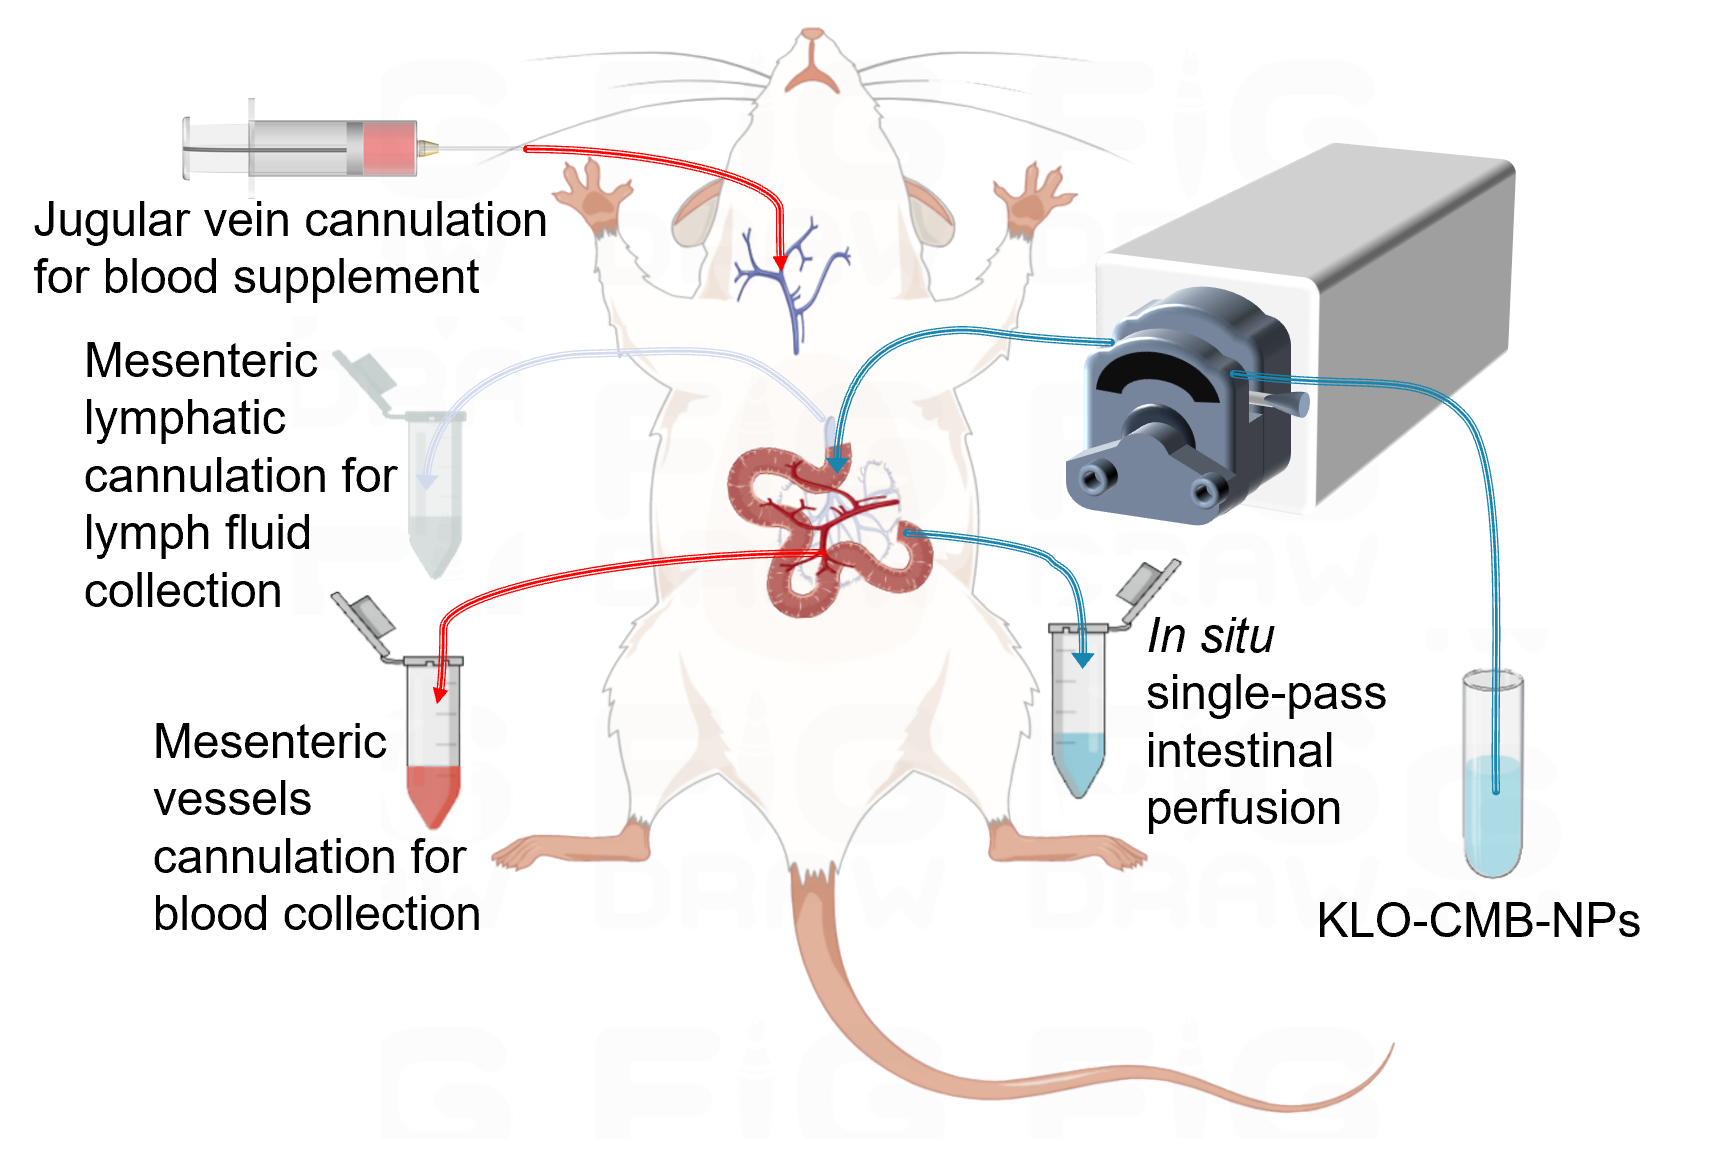
**

**Supplementary** **Fig. 5 Schematic illustrating the determination of intestinal lymphatic transport of KLO-CMB-NPs through cannulation into the lymphatic duct and blood vessel of a rat.**

**
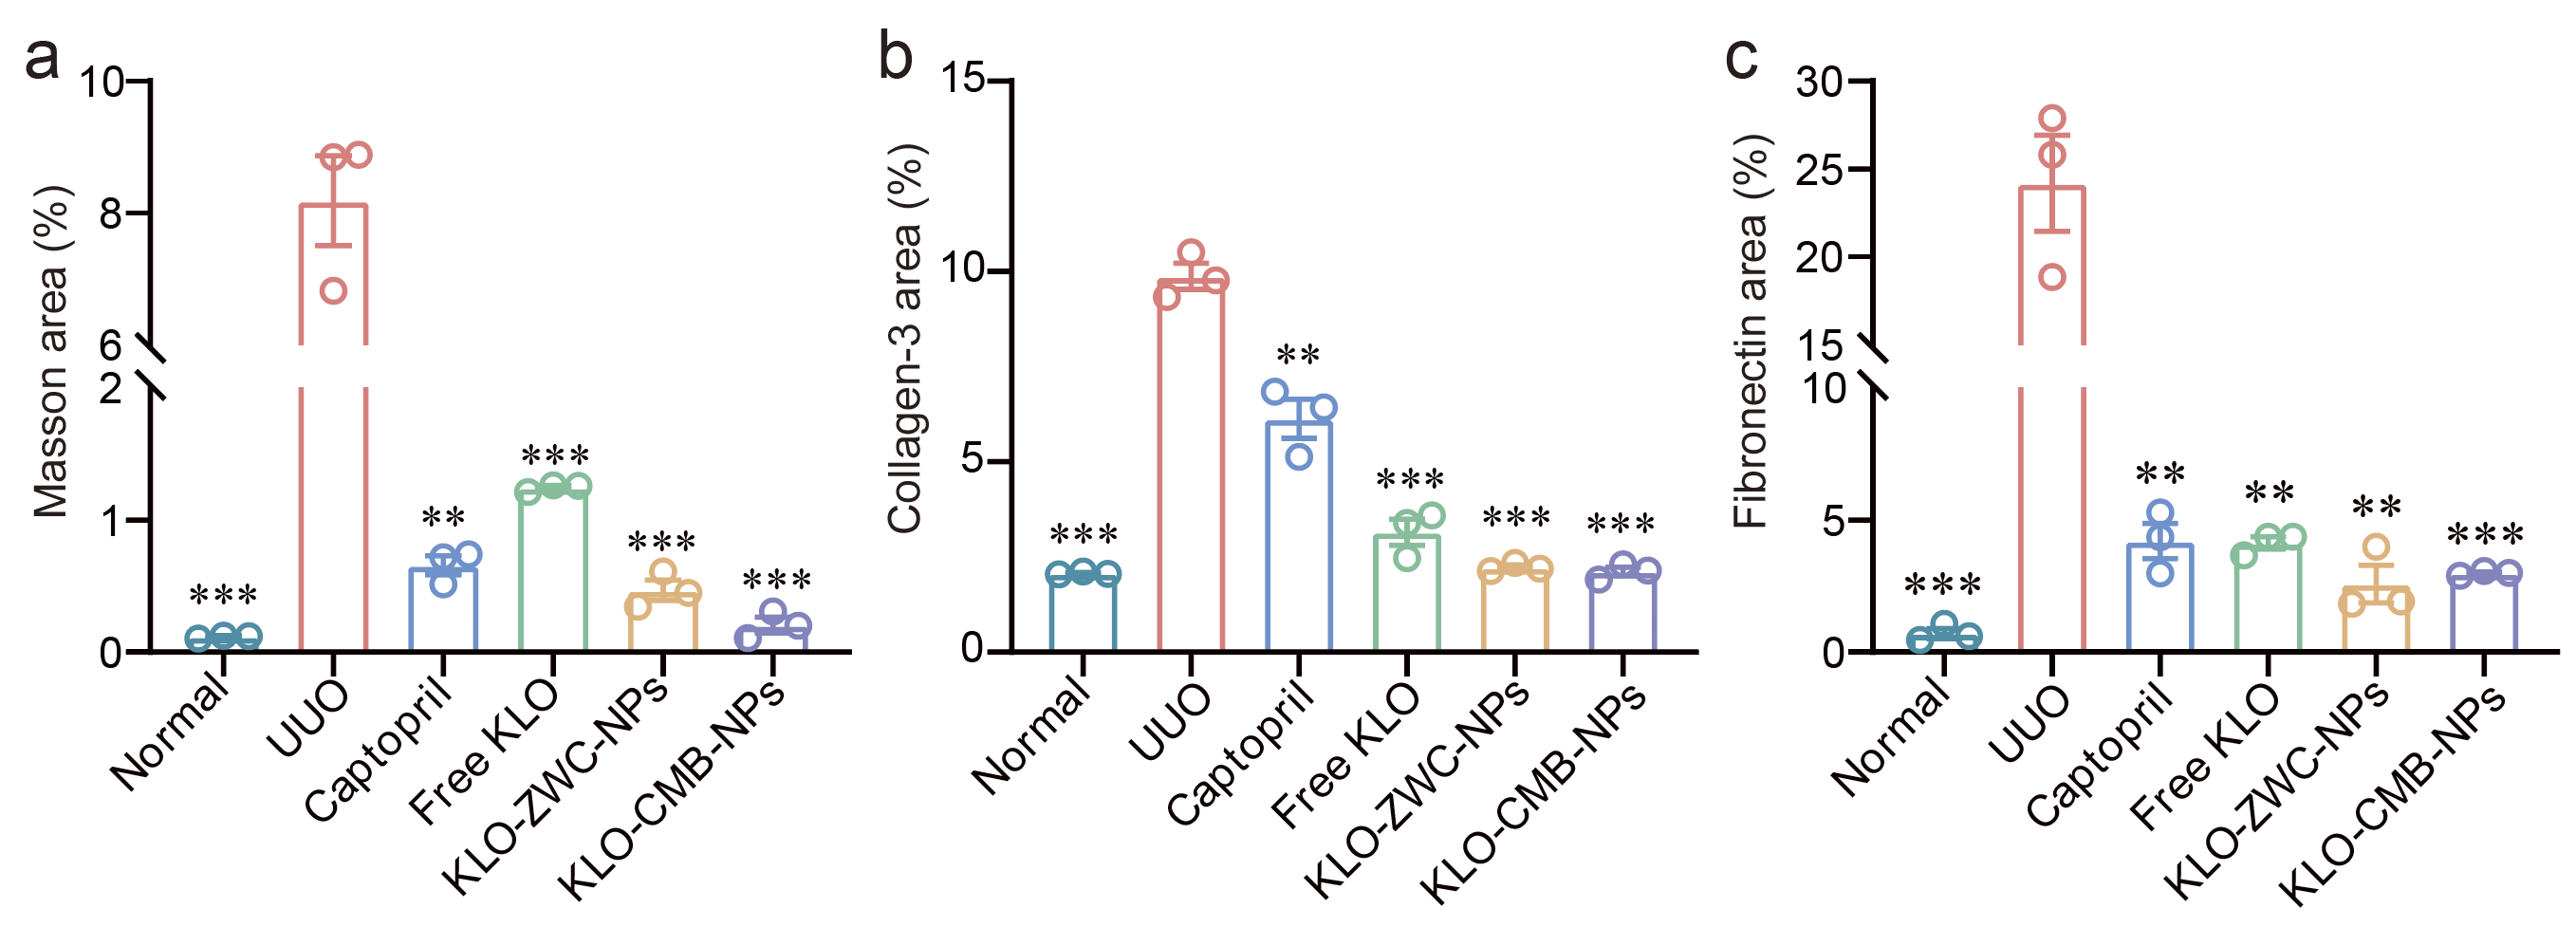
**

**Supplementary** **Fig. 6 Quantitative analysis of the accumulation areas for (a) Masson's trichrome staining, (b) collagen-3, and (c) fibronectin.** Data represent the means ± SD (n = 3), **p* < 0.05, ***p* < 0.01, ****p* < 0.001, versus the UUO group.

**
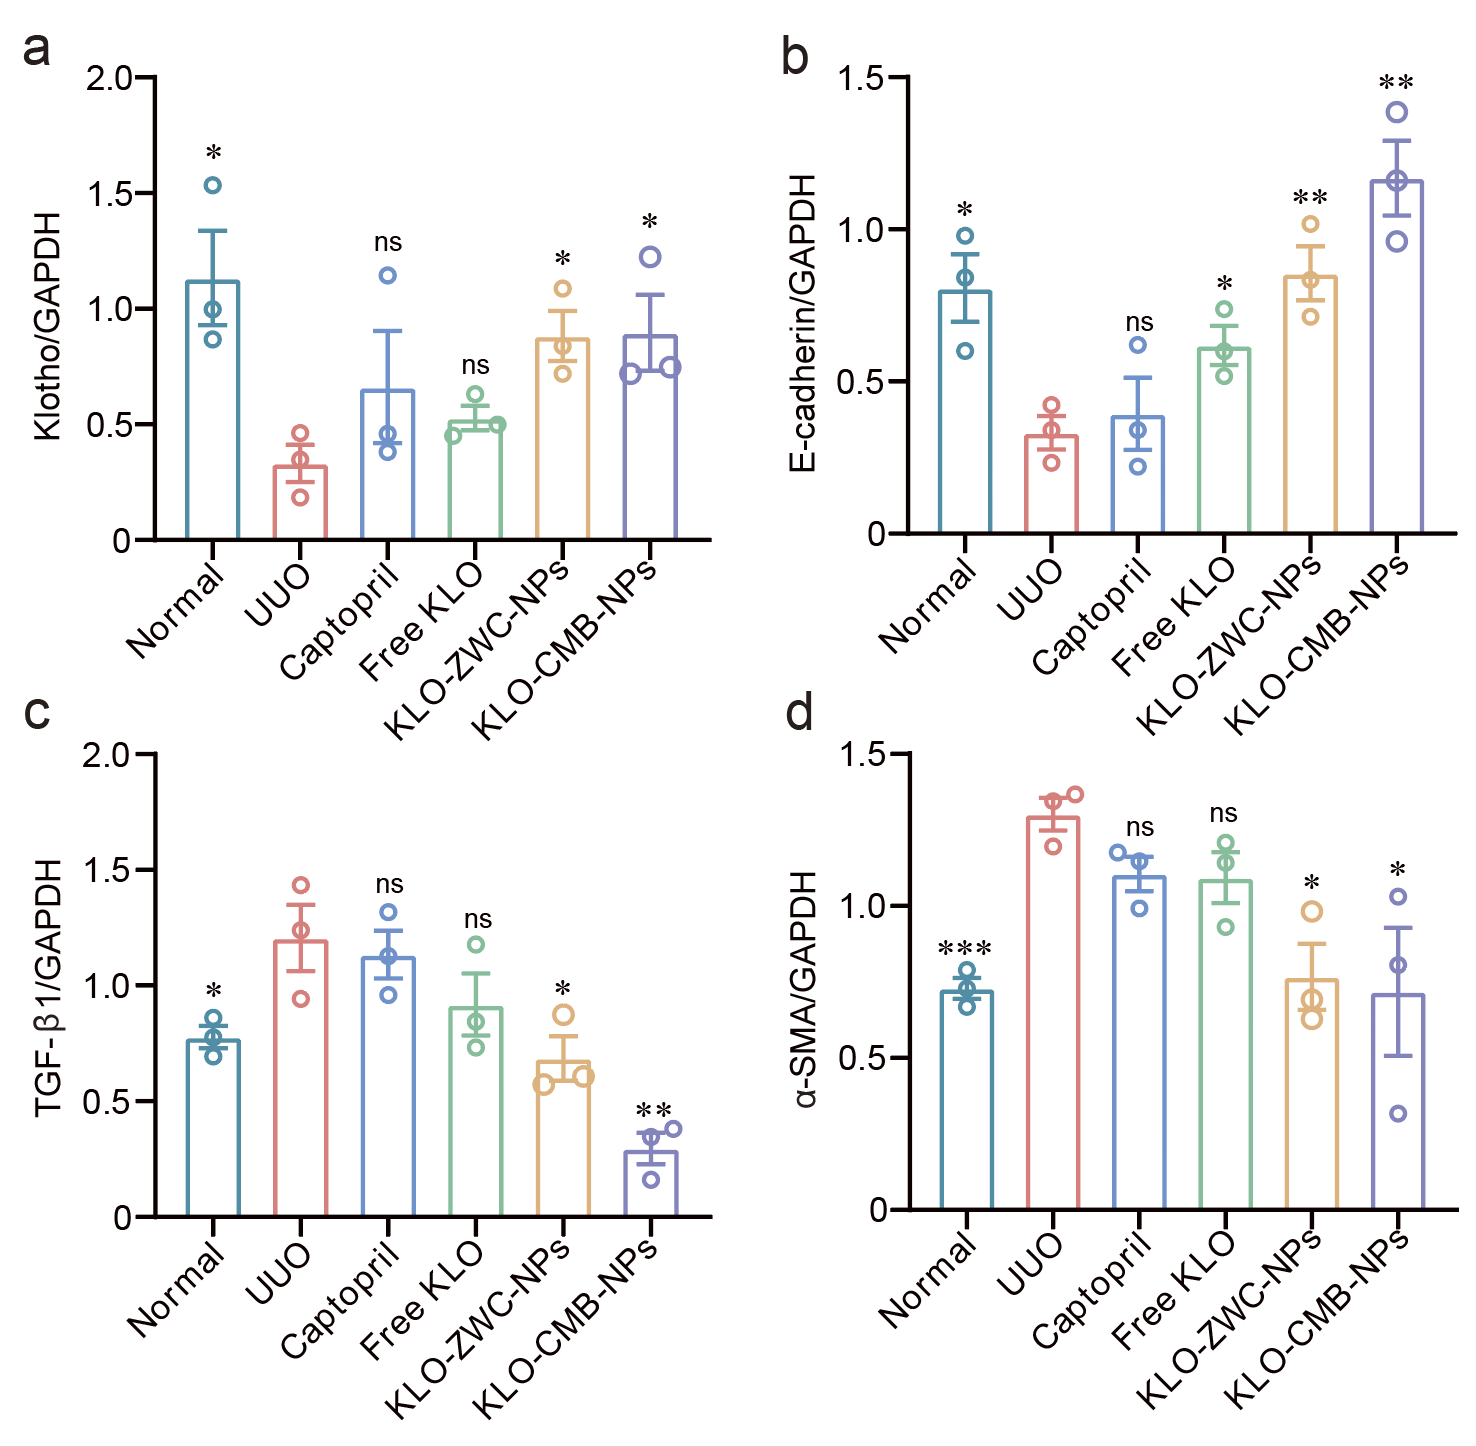
**

**Supplementary** **Fig. 7 Quantitative analysis of renal fibrosis-related protein expression in the obstructed kidney of UUO mice. a** klotho**, b** E-cadherin, **c** TGF-β-1, **d** α-SAM. Data represent the means ± SD (n = 3), **p* < 0.05, ***p* < 0.01, ****p* < 0.001, versus the UUO group.

**
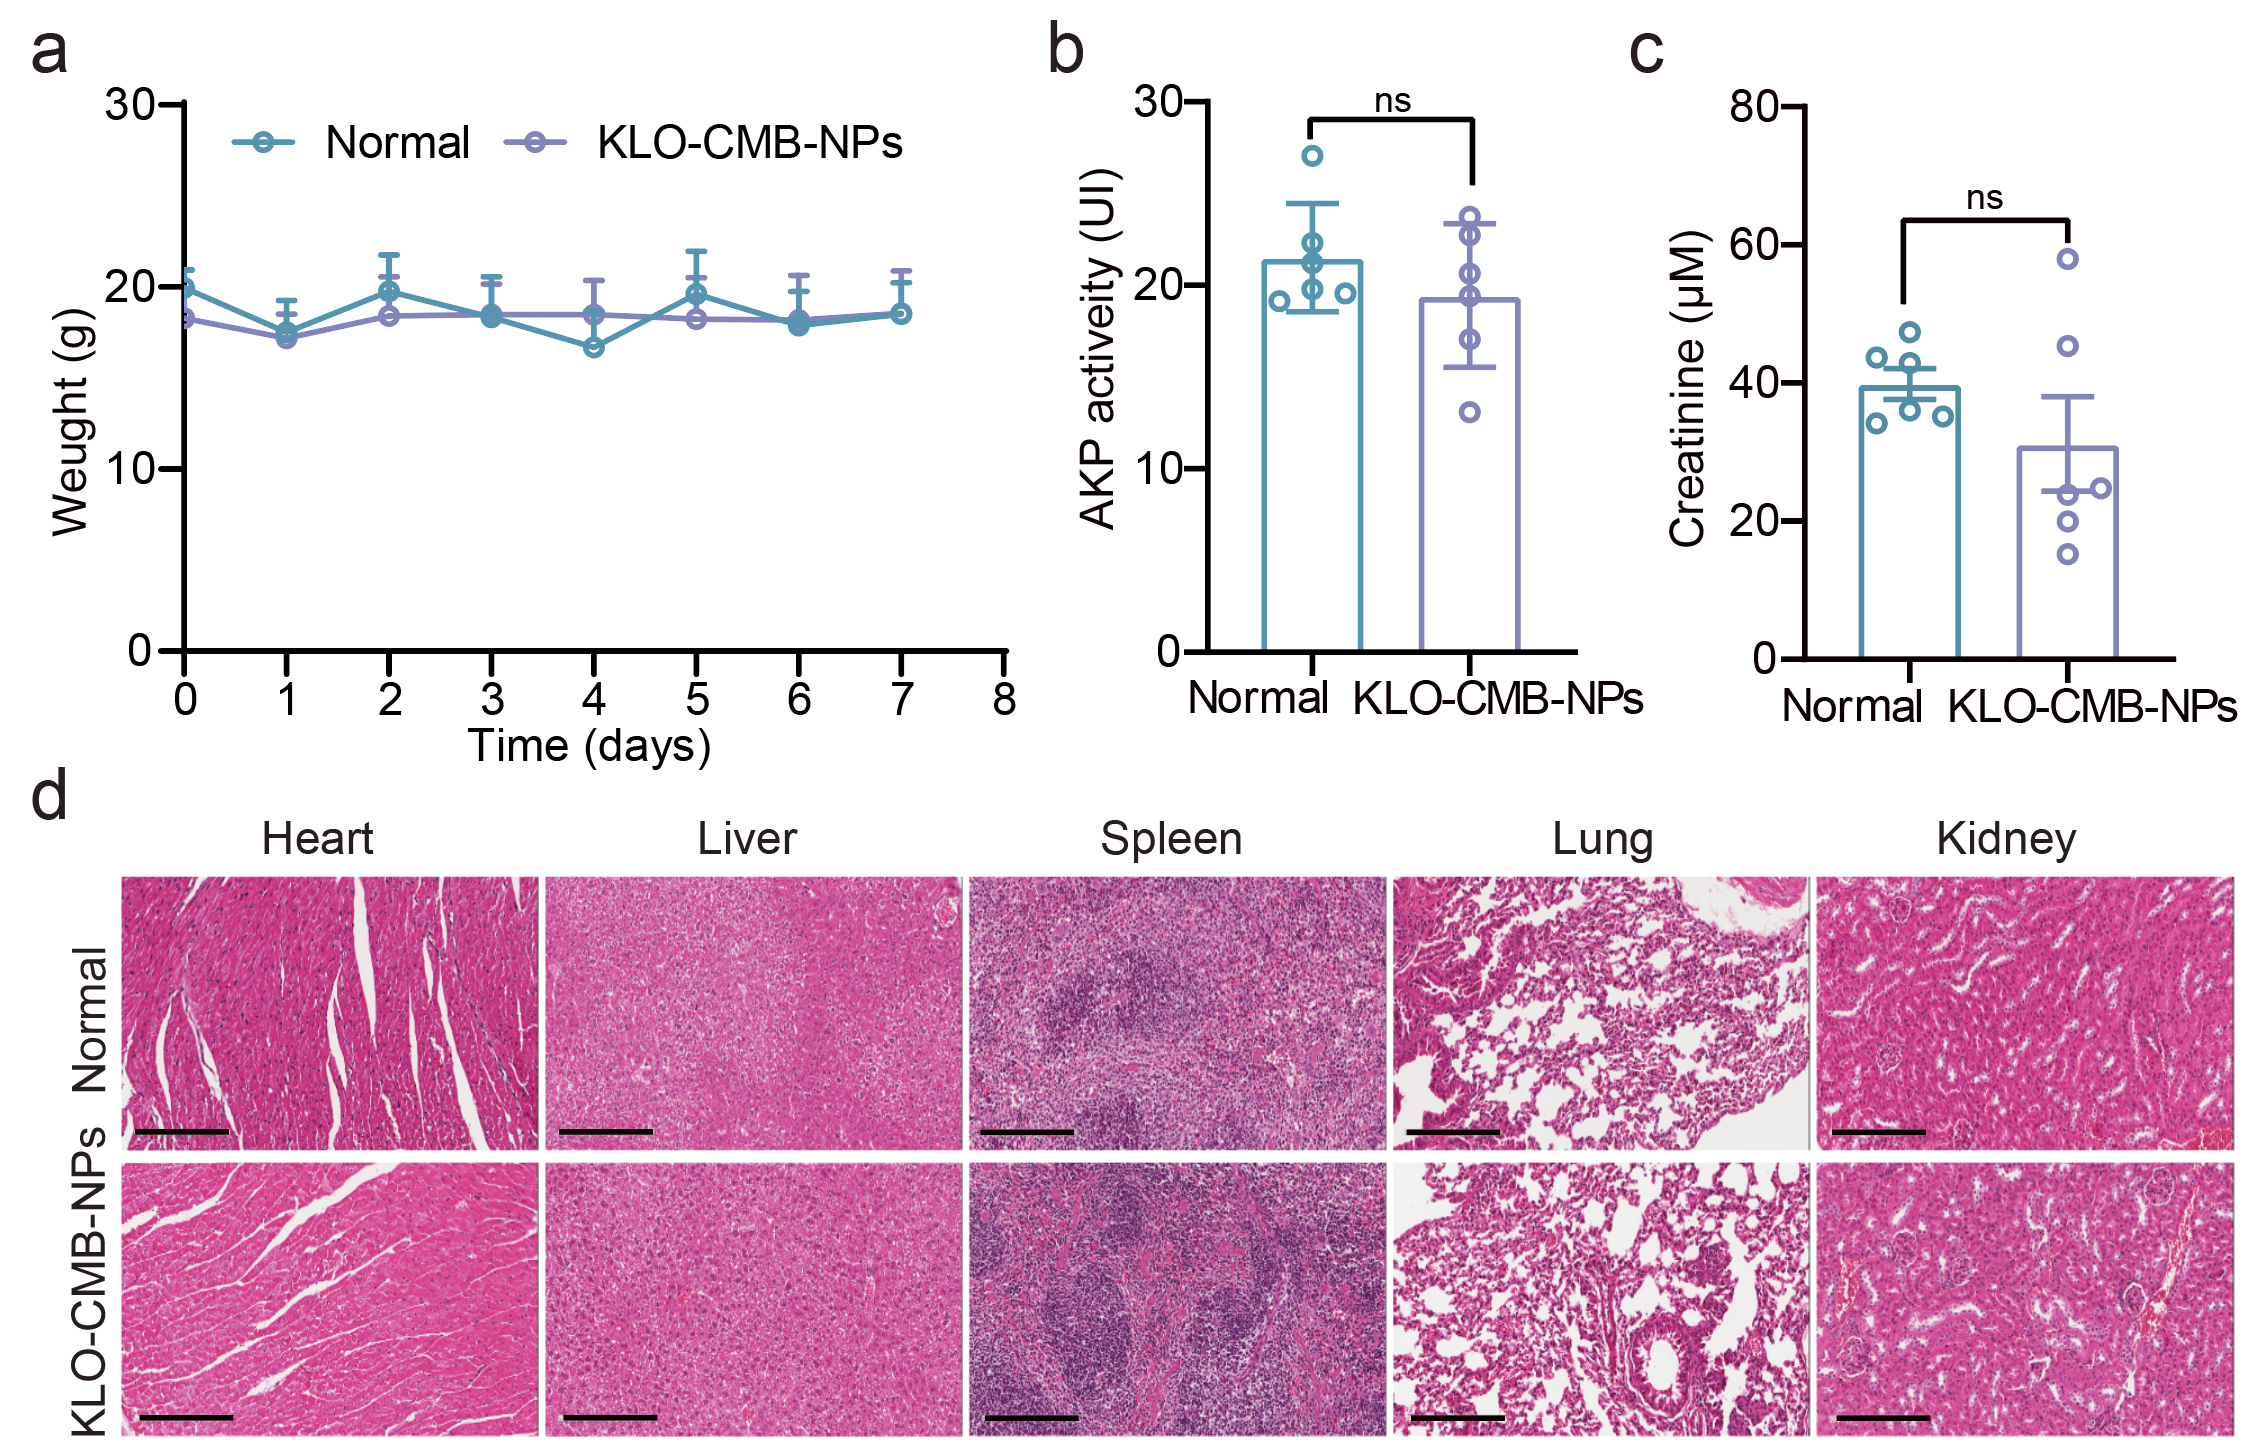
**

**Supplementary Fig. 8** **Safety and biocompatibility evaluation following 7-day consecutive oral administration of KLO-CMB-NPs (equivalent to KLO 80 μg/kg/day). a** Body weight measurement. **b** Alkaline phosphatase (AKP) activity. **c** Serum creatinine. **d** H&E-stained sections of the heart, liver, spleen, lungs, and kidneys (scale bar: 200 μm). Data represent the means ± SD (n = 6), with no significant differences observed between the normal and KLO-CMB-NPs groups.

**Supplementary tables**

**Supplementary** **Table 1 Comparison of different nanoparticle formulations in size, zeta potential (ZP), eencapsulation efficiency (EE) and loading capacity (LC).** Data represent the means ± SD (n = 3).

| Formulations | Size (nm) | ZP (mV) | EE (%) | LC (%) |
| --- | --- | --- | --- | --- |
| KLO-CMB-NPs  BSA-CMB-NPs | 172.1 ± 0.6  165.1 ± 0.5 | -0.65 ± 0.61  0.23 ± 0.01 | 98.6 ± 1.8  97.1 ± 1.2 | 6.0 ± 0.2  5.9 ± 0.2 |
| FITC-CMB-NPs | 166.4 ± 0.3 | 0.25 ± 0.07 | 97.9 ± 1.5 | 6.1 ± 0.3 |
| FRET-CMB-NPs | 180.7 ± 0.5 | -0.79 ± 0.31 | - | - |
| FRET-ZWC-NPs | 178.3 ± 1.3 | 1.39 ± 0.79 | - | - |

**Supplementary Table 2 Pharmacokinetic parameters of KLO in rats after oral administration of KLO-CMB-NPs (1 μg/kg KLO) or intravenous injection of free KLO (0.1 μg/kg KLO).** Data represent the means ± SD (n = 6).

| Parameters | KLO-CMB-NPs | Free KLO |
| --- | --- | --- |
| *C*max (pg/mL) | 152.3 ± 25.5 | 101.5 ± 24.8 |
| *t*max (h) | 0.63 ± 0.1 | 0.25 ± 0 |
| *t*1/2 (h) | 4.1 ± 1.6 | 1.5 ± 0.9 |
| *AUC*0–t (pg·h/mL) | 560.6 ± 163.2 | 210.5 ± 82.9 |
| *MRT*0–t (h) | 3.7 ± 0.8 | 1.5 ± 0.4 |
| *F* abs (%) | 2.7% |  |
